# Supplementary material for: Genomic Prediction Accuracy of Seven Breeding Selection Traits Improved by QTL Identification in Flax
Source: MDPI journal article supplement (doi:10.3390/ijms21051577), 2020-02-25
Supplement: s1 [file s1]

**Table S1.** Results of analysis of variance (ANOVA) for seven traits.

| Trait | Source          | DF   | Sum of Square (SS) | Mean SS  | F      | Pr(> F)     |
|-------|-----------------|------|--------------------|----------|--------|-------------|
| YLD   | Location        | 2    | 137.0              | 68.5     | 583.1  | <2e-16      |
|       | Year            | 4    | 255.7              | 63.9     | 544.2  | <2e-16      |
|       | Location * Year | 8    | 229.3              | 28.7     | 244.0  | <2e-16      |
|       | Residuals       | 3386 | 397.7              | 0.1      |        |             |
| DTM   | Location        | 2    | 19,772.0           | 9886.0   | 878.3  | <2e-16      |
|       | Year            | 3    | 49,889.0           | 16,630.0 | 1477.5 | <2e-16      |
|       | Location * Year | 6    | 1647.0             | 274.0    | 24.4   | <2e-16      |
|       | Residuals       | 2941 | 33,102.0           | 11.0     |        |             |
| PRO   | Location        | 2    | 8,332.0            | 4166.0   | 1688.2 | <2e-16      |
|       | Year            | 3    | 3,055.0            | 1018.0   | 412.6  | <2e-16      |
|       | Location * Year | 6    | 2,585.0            | 431.0    | 174.6  | <2e-16      |
|       | Residuals       | 2615 | 6,453.0            | 2.0      |        |             |
| OIL   | Location        | 2    | 3558.0             | 1,779.1  | 306.7  | <2e-16      |
|       | Year            | 4    | 2518.0             | 629.4    | 108.5  | <2e-16      |
|       | Location * Year | 8    | 343.0              | 42.9     | 7.4    | 8.45E-10    |
|       | Residuals       | 3388 | 19,655.0           | 5.8      |        |             |
| IOD   | Location        | 2    | 68,719.0           | 34,359.0 | 173.7  | <2e-16      |
|       | Year            | 4    | 33,202.0           | 8300.0   | 42.0   | <2e-16      |
|       | Location * Year | 8    | 15,339.0           | 1917.0   | 9.7    | 2.20E-13    |
|       | Residuals       | 3388 | 670,097.0          | 198.0    |        |             |
| LIO   | Location        | 2    | 1718.0             | 859.0    | 3.3    | 0.0383 (NS) |
|       | Year            | 4    | 31,571.0           | 7893.0   | 30.0   | <2e-16      |
|       | Location * Year | 8    | 55.0               | 7.0      | 0.02   | 1 (NS)      |
|       | Residuals       | 3388 | 891,244.0          | 263.0    |        |             |
| LIN   | Location        | 2    | 14,120.0           | 7060.0   | 28.7   | 4.40E-13    |
|       | Year            | 4    | 31,867.0           | 7967.0   | 32.4   | <2e-16      |
|       | Location * Year | 8    | 4,891.0            | 611.0    | 2.5    | 0.011       |
|       | Residuals       | 3388 | 833,644.0          | 246.0    |        |             |

**Table S3.** Average allele effects of QTL identified by different statistical models for all the seven traits.

| Model type | Model          | No. of QTL | Average $R^2$ of QTL |
|------------|----------------|------------|----------------------|
| SS         | GLM            | 133        | 3.74 ± 6.12          |
|            | MLM            | 31         | 3.46 ± 4.52          |
| SM         | FarmCPU        | 96         | 4.71 ± 7.58          |
|            | FASTmrEMMA     | 52         | 5.22 ± 8.03          |
|            | FASTmrMLM      | 96         | 4.84 ± 7.69          |
|            | ISIS EM-BLASSO | 113        | 6.09 ± 8.02          |
|            | mrMLM          | 121        | 5.32 ± 8.65          |
|            | pKWmeB         | 133        | 5.26 ± 6.51          |
|            | pLARmeB        | 130        | 4.78 ± 7.64          |
| BM         | RTM-GWAS       | 1,208      | 3.37 ± 5.35          |

SS, single SNP based single locus model; SM, single SNP based multi-locus model; BM, haplotype block based multi-locus model;.

**Table S4.** Summary statistics of QTL identified by seven multi-locus models for the seven traits.

| Catagory | Model                  | YL<br>D | DT<br>M | PR<br>O | OI<br>L | LO<br>D | LI<br>O | LI<br>N | All<br>trait<br>s |
|----------|------------------------|---------|---------|---------|---------|---------|---------|---------|-------------------|
| Total    | FarmCPU (total)        | 6       | 19      | 15      | 11      | 23      | 35      | 19      | 96                |
|          | FASTmrEMMA (total)     | 12      | 9       | 11      | 13      | 7       | 8       | 8       | 52                |
|          | FASTmrMLM (total)      | 17      | 19      | 11      | 29      | 18      | 18      | 16      | 96                |
|          | ISIS EM-BLASSO (total) | 16      | 28      | 21      | 28      | 19      | 13      | 12      | 113               |

|                        |                                       |           |           |           |           |           |           |           |            |
|------------------------|---------------------------------------|-----------|-----------|-----------|-----------|-----------|-----------|-----------|------------|
|                        | mrMLM (total)                         | 26        | 27        | 19        | 47        | 25        | 28        | 27        | 151        |
|                        | pKWmEB (total)                        | 21        | 25        | 17        | 28        | 26        | 21        | 19        | 133        |
|                        | pLARmEB (total)                       | 13        | 19        | 20        | 33        | 28        | 31        | 29        | 130        |
|                        | <b>Total</b>                          | <b>53</b> | <b>71</b> | <b>51</b> | <b>84</b> | <b>72</b> | <b>87</b> | <b>67</b> | <b>355</b> |
| Unique to single model | FarmCPU                               | 3         | 11        | 6         | 4         | 11        | 23        | 6         | 47         |
|                        | FASTmrEMMA                            | 3         | 2         | 1         | 2         | 1         | 1         | 2         | 6          |
|                        | FASTmrMLM                             | 3         | 3         | 0         | 3         | 3         | 1         | 3         | 10         |
|                        | ISIS EM-BLASSO                        | 8         | 10        | 6         | 7         | 8         | 6         | 4         | 33         |
|                        | mrMLM                                 | 3         | 7         | 2         | 7         | 4         | 9         | 7         | 25         |
|                        | pKWmEB                                | 4         | 8         | 8         | 12        | 11        | 10        | 9         | 44         |
|                        | pLARmEB                               | 3         | 2         | 6         | 5         | 5         | 13        | 11        | 29         |
|                        | <b>Sub total</b>                      | <b>27</b> | <b>43</b> | <b>29</b> | <b>40</b> | <b>43</b> | <b>63</b> | <b>42</b> | <b>194</b> |
| Shared by two models   | FarmCPU, ISIS EM-BLASSO               | 0         | 0         | 1         | 0         | 0         | 0         | 0         | 2          |
|                        | FarmCPU, mrMLM                        | 0         | 0         | 0         | 0         | 0         | 0         | 1         | 1          |
|                        | FarmCPU, pKWmEB                       | 0         | 1         | 0         | 1         | 0         | 0         | 0         | 3          |
|                        | FarmCPU, pLARmEB                      | 0         | 1         | 0         | 0         | 2         | 1         | 4         | 5          |
|                        | FASTmrEMMA, FASTmrMLM                 | 0         | 0         | 0         | 1         | 0         | 0         | 0         | 1          |
|                        | FASTmrEMMA, pKWmEB                    | 1         | 0         | 1         | 2         | 0         | 1         | 1         | 4          |
|                        | FASTmrEMMA, pLARmEB                   | 1         | 0         | 0         | 0         | 0         | 0         | 0         | 0          |
|                        | FASTmrMLM, FarmCPU                    | 0         | 0         | 0         | 0         | 1         | 0         | 0         | 0          |
|                        | FASTmrMLM, ISIS EM-BLASSO             | 0         | 0         | 0         | 1         | 0         | 0         | 0         | 2          |
|                        | FASTmrMLM, mrMLM                      | 4         | 3         | 0         | 2         | 1         | 1         | 0         | 7          |
|                        | FASTmrMLM, pKWmEB                     | 2         | 0         | 0         | 0         | 0         | 0         | 1         | 1          |
|                        | FASTmrMLM, pLARmEB                    | 0         | 0         | 0         | 1         | 0         | 1         | 2         | 1          |
|                        | ISIS EM-BLASSO, mrMLM                 | 0         | 0         | 0         | 0         | 0         | 0         | 1         | 0          |
|                        | ISIS EM-BLASSO, pKWmEB                | 1         | 1         | 0         | 2         | 3         | 2         | 3         | 9          |
|                        | ISIS EM-BLASSO, pLARmEB               | 0         | 2         | 0         | 1         | 1         | 1         | 0         | 4          |
|                        | mrMLM, pKWmEB                         | 0         | 0         | 0         | 0         | 0         | 0         | 0         | 4          |
|                        | mrMLM, pLARmEB                        | 0         | 0         | 1         | 5         | 2         | 1         | 0         | 6          |
|                        | pKWmEB, pLARmEB                       | 2         | 2         | 0         | 1         | 2         | 0         | 0         | 5          |
|                        | <b>Sub total</b>                      | <b>11</b> | <b>10</b> | <b>3</b>  | <b>17</b> | <b>12</b> | <b>8</b>  | <b>13</b> | <b>55</b>  |
| Shared by three models | FarmCPU, ISIS EM-BLASSO, mrMLM        | 1         | 0         | 0         | 1         | 0         | 0         | 0         | 0          |
|                        | FarmCPU, ISIS EM-BLASSO, pKWmEB       | 0         | 1         | 0         | 0         | 0         | 0         | 0         | 1          |
|                        | FarmCPU, ISIS EM-BLASSO, pLARmEB      | 0         | 1         | 1         | 0         | 0         | 0         | 0         | 2          |
|                        | FarmCPU, mrMLM, pLARmEB               | 0         | 0         | 1         | 0         | 0         | 0         | 0         | 2          |
|                        | FarmCPU, pKWmEB, pLARmEB              | 0         | 0         | 0         | 0         | 1         | 0         | 0         | 1          |
|                        | FASTmrEMMA, FarmCPU, pLARmEB          | 0         | 1         | 0         | 0         | 0         | 0         | 0         | 1          |
|                        | FASTmrEMMA, FASTmrMLM, ISIS EM-BLASSO | 0         | 0         | 0         | 1         | 0         | 0         | 0         | 1          |
|                        | FASTmrEMMA, FASTmrMLM, mrMLM          | 2         | 0         | 0         | 1         | 0         | 0         | 0         | 3          |
|                        | FASTmrEMMA, FASTmrMLM, pLARmEB        | 0         | 0         | 0         | 1         | 0         | 1         | 1         | 1          |
|                        | FASTmrEMMA, ISIS EM-BLASSO, mrMLM     | 0         | 0         | 1         | 0         | 0         | 0         | 0         | 1          |
|                        | FASTmrEMMA, ISIS EM-BLASSO, pKWmEB    | 0         | 0         | 1         | 0         | 0         | 0         | 0         | 2          |
|                        | FASTmrEMMA, mrMLM, pKWmEB             | 1         | 0         | 0         | 0         | 0         | 0         | 0         | 1          |
|                        | FASTmrEMMA, pKWmEB, pLARmEB           | 1         | 0         | 0         | 0         | 1         | 0         | 0         | 2          |
|                        | FASTmrMLM, FarmCPU, mrMLM             | 0         | 1         | 0         | 1         | 0         | 1         | 0         | 2          |
|                        | FASTmrMLM, FarmCPU, pKWmEB            | 0         | 0         | 0         | 0         | 0         | 0         | 0         | 2          |
|                        | FASTmrMLM, FarmCPU, pLARmEB           | 0         | 0         | 0         | 1         | 0         | 0         | 1         | 1          |
|                        | FASTmrMLM, ISIS EM-BLASSO, mrMLM      | 0         | 1         | 1         | 1         | 0         | 0         | 0         | 1          |
|                        | FASTmrMLM, ISIS EM-BLASSO, pLARmEB    | 0         | 0         | 0         | 0         | 1         | 1         | 0         | 2          |
|                        | FASTmrMLM, mrMLM, pKWmEB              | 2         | 1         | 0         | 1         | 0         | 0         | 0         | 4          |
|                        | FASTmrMLM, mrMLM, pLARmEB             | 0         | 0         | 1         | 2         | 2         | 1         | 1         | 3          |
|                        | FASTmrMLM, pKWmEB, pLARmEB            | 0         | 0         | 0         | 0         | 0         | 1         | 0         | 1          |
|                        | ISIS EM-BLASSO, mrMLM, pKWmEB         | 0         | 0         | 1         | 0         | 0         | 0         | 0         | 1          |
|                        | ISIS EM-BLASSO, mrMLM, pLARmEB        | 0         | 0         | 1         | 3         | 0         | 0         | 0         | 5          |
|                        | ISIS EM-BLASSO, pKWmEB, pLARmEB       | 0         | 0         | 0         | 0         | 1         | 0         | 0         | 1          |
|                        | mrMLM, pKWmEB, pLARmEB                | 2         | 0         | 0         | 1         | 1         | 0         | 1         | 4          |
|                        | <b>Sub total</b>                      | <b>9</b>  | <b>6</b>  | <b>8</b>  | <b>14</b> | <b>7</b>  | <b>5</b>  | <b>4</b>  | <b>45</b>  |

|                                     |                                                            |   |   |   |   |   |   |   |    |
|-------------------------------------|------------------------------------------------------------|---|---|---|---|---|---|---|----|
| Share<br>d by<br>four<br>model<br>s | FarmCPU,ISIS EM-BLASSO,mrMLM,pKWmEB                        | 0 | 0 | 1 | 1 | 0 | 0 | 0 | 2  |
|                                     | FarmCPU,ISIS EM-BLASSO,pKWmEB,pLARmEB                      | 0 | 0 | 1 | 0 | 0 | 0 | 0 | 1  |
|                                     | FarmCPU,mrMLM,pKWmEB,pLARmEB                               | 0 | 0 | 0 | 0 | 0 | 0 | 1 | 0  |
|                                     | FASTmrEMMA,FarmCPU,pKWmEB,pLARmEB                          | 0 | 0 | 0 | 0 | 0 | 1 | 0 | 1  |
|                                     | FASTmrEMMA,FASTmrMLM,FarmCPU,pLARmEB                       | 0 | 0 | 0 | 0 | 1 | 0 | 0 | 1  |
|                                     | FASTmrEMMA,FASTmrMLM,ISIS EM-BLASSO,pKWmEB                 | 0 | 1 | 0 | 0 | 0 | 0 | 0 | 1  |
|                                     | FASTmrEMMA,FASTmrMLM,ISIS EM-BLASSO,pLARmEB                | 0 | 0 | 1 | 1 | 0 | 0 | 0 | 2  |
|                                     | FASTmrEMMA,FASTmrMLM,mrMLM,pKWmEB                          | 0 | 0 | 1 | 0 | 0 | 0 | 0 | 2  |
|                                     | FASTmrEMMA,FASTmrMLM,mrMLM,pLARmEB                         | 0 | 0 | 0 | 1 | 0 | 1 | 0 | 2  |
|                                     | FASTmrEMMA,ISIS EM-BLASSO,pKWmEB,pLARmEB                   | 0 | 1 | 0 | 0 | 0 | 0 | 0 | 1  |
|                                     | FASTmrMLM,FarmCPU,ISIS EM-BLASSO,pKWmEB                    | 1 | 0 | 0 | 0 | 0 | 0 | 0 | 0  |
|                                     | FASTmrMLM,FarmCPU,mrMLM,pLARmEB                            | 0 | 0 | 1 | 0 | 2 | 2 | 1 | 3  |
|                                     | FASTmrMLM,FarmCPU,pKWmEB,pLARmEB                           | 0 | 0 | 0 | 0 | 0 | 1 | 0 | 0  |
|                                     | FASTmrMLM,ISIS EM-BLASSO,mrMLM,pKWmEB                      | 1 | 1 | 0 | 0 | 1 | 0 | 0 | 2  |
|                                     | FASTmrMLM,ISIS EM-BLASSO,mrMLM,pLARmEB                     | 1 | 1 | 0 | 2 | 1 | 0 | 0 | 5  |
|                                     | FASTmrMLM,ISIS EM-BLASSO,pKWmEB,pLARmEB                    | 0 | 0 | 0 | 1 | 0 | 0 | 0 | 1  |
|                                     | FASTmrMLM,mrMLM,pKWmEB,pLARmEB                             | 0 | 0 | 0 | 1 | 0 | 0 | 0 | 2  |
|                                     | Sub total                                                  | 3 | 4 | 5 | 7 | 5 | 5 | 2 | 26 |
| Share<br>d by<br>five<br>model<br>s | ISIS EM-BLASSO,mrMLM,pKWmEB,pLARmEB                        | 0 | 1 | 0 | 0 | 0 | 0 | 0 | 1  |
|                                     | FASTmrEMMA,FASTmrMLM,FarmCPU,ISIS EM-BLASSO,pKWmEB         | 0 | 0 | 0 | 0 | 0 | 1 | 0 | 0  |
|                                     | FASTmrEMMA,FASTmrMLM,FarmCPU,mrMLM,pLARmEB                 | 0 | 0 | 0 | 0 | 0 | 1 | 0 | 1  |
|                                     | FASTmrEMMA,FASTmrMLM,ISIS EM-BLASSO,mrMLM,pLARmEB          | 0 | 0 | 1 | 1 | 0 | 0 | 1 | 1  |
|                                     | FASTmrEMMA,FASTmrMLM,mrMLM,pKWmEB,pLARmEB                  | 0 | 0 | 1 | 0 | 0 | 0 | 0 | 0  |
|                                     | FASTmrEMMA,ISIS EM-BLASSO,mrMLM,pKWmEB,pLARmEB             | 1 | 0 | 0 | 0 | 0 | 0 | 0 | 1  |
|                                     | FASTmrMLM,FarmCPU,ISIS EM-BLASSO,mrMLM,pLARmEB             | 0 | 0 | 1 | 0 | 0 | 0 | 1 | 2  |
|                                     | FASTmrMLM,FarmCPU,ISIS EM-BLASSO,pKWmEB,pLARmEB            | 0 | 0 | 0 | 1 | 0 | 0 | 0 | 1  |
|                                     | FASTmrMLM,FarmCPU,mrMLM,pKWmEB,pLARmEB                     | 0 | 0 | 0 | 0 | 0 | 1 | 1 | 2  |
|                                     | FASTmrMLM,ISIS EM-BLASSO,mrMLM,pKWmEB,pLARmEB              | 0 | 3 | 0 | 1 | 0 | 0 | 0 | 7  |
|                                     | Sub total                                                  | 1 | 4 | 3 | 3 | 0 | 3 | 3 | 16 |
| Share<br>d by<br>six<br>model<br>s  | FASTmrEMMA,FarmCPU,ISIS EM-BLASSO,mrMLM,pKWmEB,pLARmEB     | 1 | 0 | 0 | 0 | 0 | 0 | 0 | 1  |
|                                     | FASTmrEMMA,FASTmrMLM,FarmCPU,ISIS EM-BLASSO,mrMLM,pLARmEB  | 0 | 0 | 1 | 0 | 0 | 0 | 1 | 1  |
|                                     | FASTmrEMMA,FASTmrMLM,FarmCPU,ISIS EM-BLASSO,pKWmEB,pLARmEB | 0 | 0 | 0 | 0 | 1 | 0 | 1 | 1  |
|                                     | FASTmrEMMA,FASTmrMLM,FarmCPU,mrMLM,pKWmEB,pLARmEB          | 0 | 0 | 0 | 0 | 2 | 1 | 1 | 1  |
|                                     | FASTmrEMMA,FASTmrMLM,ISIS EM-BLASSO,mrMLM,pKWmEB,pLARmEB   | 1 | 2 | 1 | 2 | 0 | 0 | 0 | 7  |
|                                     | FASTmrMLM,FarmCPU,ISIS EM-BLASSO,mrMLM,pKWmEB,pLARmEB      | 0 | 0 | 0 | 1 | 1 | 2 | 0 | 3  |
|                                     | Sub total                                                  | 2 | 2 | 2 | 3 | 4 | 3 | 3 | 14 |

|                                      |                                                                       |   |   |   |   |   |   |   |   |
|--------------------------------------|-----------------------------------------------------------------------|---|---|---|---|---|---|---|---|
| Share<br>d by<br>seven<br>model<br>s | FASTmrEMMA,FASTmrMLM,FarmCPU,ISIS EM-<br>BLASSO,mrMLM,pKWmeB,pLARMmeB | 0 | 2 | 1 | 0 | 1 | 0 | 0 | 5 |
|--------------------------------------|-----------------------------------------------------------------------|---|---|---|---|---|---|---|---|

**Table S5.** Analysis of variance (ANOVA) for genomic prediction accuracy ( $r$ ) of genomic selection models constructed by different traits, statistical models of GWAS and marker sets.

| Source                                            | DF     | Sum of Square | Mean Square | F Value | P (> F) |
|---------------------------------------------------|--------|---------------|-------------|---------|---------|
| GWAS Models                                       | 4      | 95.32         | 23.83       | 7497.8  | <2e-16  |
| Traits                                            | 6      | 239.32        | 39.89       | 12550.3 | <2e-16  |
| Marker types                                      | 1      | 1.46          | 1.46        | 460.7   | <2e-16  |
| GWAS models $\times$ Traits                       | 24     | 51.37         | 2.14        | 673.5   | <2e-16  |
| GWAS models $\times$ Marker types                 | 3      | 21.73         | 7.24        | 2279.2  | <2e-16  |
| Traits $\times$ Marker sets                       | 6      | 13.84         | 2.31        | 725.9   | <2e-16  |
| GWAS models $\times$ Traits $\times$ Marker types | 18     | 16.58         | 0.92        | 289.8   | <2e-16  |
| Error                                             | 31,437 | 99.91         |             |         |         |

**Table S6.** Analysis of variance (ANOVA) for genomic prediction accuracy ( $r$ ) in terms of locations (Morden and Saskatoon, Canada, average of two locations), traits (YLD, DTM, PRO, OIL, IOD, LIO and LIN), and marker types (all SNPs, QTL of single traits and QTL of all traits).

| Source                  | DF    | F        | P                   |
|-------------------------|-------|----------|---------------------|
| Location (L)            | 2     | 129.86   | <2.2 <sup>-16</sup> |
| Traits (T)              | 6     | 12939.93 | <2.2 <sup>-16</sup> |
| Marker types (M)        | 2     | 10927.98 | <2.2 <sup>-16</sup> |
| L $\times$ T            | 12    | 214.87   | <2.2 <sup>-16</sup> |
| L $\times$ M            | 4     | 23.93    | <2.2 <sup>-16</sup> |
| T $\times$ M            | 12    | 695.59   | <2.2 <sup>-16</sup> |
| L $\times$ T $\times$ M | 12    | 24.2     | <2.2 <sup>-16</sup> |
| Error                   | 20937 |          |                     |
| Total                   | 20987 |          |                     |

**Table S7.** Pearson correlation coefficients of phenotypes among the seven traits.

| Trait | DTM    | PRO      | OIL      | IOD      | LIO      | LIN      |
|-------|--------|----------|----------|----------|----------|----------|
| YLD   | 0.27** | -0.73 ** | 0.57 **  | 0.46 **  | -0.51 ** | 0.49 **  |
| DTM   |        | -0.45 ** | 0.24 **  | 0.13     | -0.22 ** | 0.18 *   |
| PRO   |        |          | -0.70 ** | -0.52 ** | 0.52 **  | -0.52 ** |
| OIL   |        |          |          | 0.37 **  | -0.27 ** | 0.31 **  |
| IOD   |        |          |          |          | -0.95 ** | 0.99 **  |
| LIO   |        |          |          |          |          | -0.99 ** |

\* and \*\* represent statistical significance at 0.05 and 0.01 probability level, respectively. seed yield; DTM, days to maturity; PRO, protein content; OIL, oil content; IOD, iodine value; LIO, linoleic acid content; LIN, linolenic acid content.
